# Supplementary material for: Coexpression network analysis of neural tissue reveals perturbations in developmental processes in schizophrenia
Source: HighWire-hosted journal article supplement (doi:10.1101/gr.101956.109), 2010-03-02
Supplement: Supplementary_Table_9.docx [file Supplementary_Table_9.docx]

Supplementary Table 9. Top functional networks associated with age-related modules in subjects with schizophrenia.

| **Module 7** | |  |  |  |  | **Module 14** | |  |  |  |
| --- | --- | --- | --- | --- | --- | --- | --- | --- | --- | --- |
| ID | Molecules in Network: | Score: | #: | Top Functions: |  | ID | Molecules in Network | Score: | #: | Top Functions: |
| 1 | ***ABCD3, ARHGDIG, CALD1, CAMK2B,*** *CaMKII,* ***CDK5R2, CORO1A, CRMP1, CX3CL1***, F Actin, ***F8A1, FNBP1, ITGAV, ITPKA, KANK1, MYBL1***, Nfat (family), NFkB (complex), Pak, Pld, ***PLD3, PLXNB1, PPAP2A, RAB15,*** Rac, Ras homolog, ***RHOQ, ROCK1, RPH3A, STX1A, STXBP1, SYN1,*** *TCR,* ***TNS1, VIPR1*** | 44 | 26 | Molecular Transport, Small Molecule Biochemistry, Amino Acid Metabolism |  | 1 | 26s Proteasome, ***ACTR3, AIMP1, ASF1A*,** Ck2, ***CREBBP, CUL4A, DMD, FAIM, FUBP1****,* ***H3F3A***, hCG, Hdac, HISTONE, Histone h3, ***HNRNPH1, IBTK, NAP1L1, NCOA1****,* NFkB (complex), ***PKD2, PPM1B, PPP1CB, RB1, RB1CC1, RBL2****,* RNA polymerase II, **S*FRS12, SMARCA1, SP3, TAF2, TANK, TERF1*,** Vegf, ***ZFAND6*** | 55 | 26 | Gene Expression, DNA Replication, Recombination, and Repair, Cell Cycle |
| 2 | ***AK2***, Akt, ***ARFIP1, BID***, Calmodulin, Caspase, Ck2, ***CREB3L2, EXOSC8,*** FSH**, *GABBR2****,* Histone h4, ***HMGN1****,* Interferon alpha, Jnk, ***KAT2B, KCNJ6, LBR,*** *MIR124****, NME1****, P38 MAPK****, PAK2, PHIP***, Pka, ***PPEF1***, RNA polymerase II, ***SEC11A, SH3GLB1, SLC16A1, SMC5, SSFA2, STK3, SWAP70, TAF4****,* Ubiquitin | 35 | 22 | Behavior, Cancer, Cellular Assembly and Organization |  | 2 | *ABCC6, APEH, C11ORF58,* ***CETN3,*** *CHMP1B, COX8A, DDX23, DHX8, FAM158A,* ***FKSG17,*** *GYS2,* HLA-B, *HNF4A, ITGB3,* ***KDM6A, KLHL20,*** *LAPTM4A, LRRC40,* ***LUC7L2,*** *MRPL3, MRPS12,* ***NEK4, RAP2C, RCBTB1, SDHD, SFRS11, SLC35A1, SPAST,*** *SRP68,* ***TMEM123****, TPP2,* ***TTC35,*** *VEGFA, WBP4, WRNIP1* | 26 | 14 | Cardiovascular System Development and Function, Cellular Development, Organismal Development |
| 3 | *ABHD6, ACOT8,* ***APEH, BAI2****, C12ORF11,* ***C14ORF135, CLN5, DERA****, FAM86C, FBP1,* ***FXYD7, GNS****, HNF4A, KRT8, MIPEP,* ***NEK7****, NLN,* ***OSBPL11****, PAAF1,* ***PARP4****, PDS5B, PFKFB4,* ***PTPRN****, REC8, REXO2, SMC1-SA2,* ***SMC1A****, SPCS3,* ***STAG2****, STAG3, STYXL1,* ***TCF12,*** *TNFAIP1, UBA5, VPS29* | 22 | 14 | Cellular Assembly and Organization, Lipid Metabolism, Nucleic Acid Metabolism |  | 3 | ***ACADM****,* diacylglycerol, E2F4-Smad2/3-Smad4, *ERBB2,* Estrogen Receptor, ***FBXL5****, FBXW8,* ***HIPK1****,* ***IMPACT*,** Insulin,***IPO7, JMJD1C****, KIAA0101, KIAA1524*, Max-Myc, ***ME1,*** *MYC, NFYB, P38 MAPK, PCNA,* Pka, ***POLS,*** *RPL41,* ***SGMS1,*** *SGMS2, SMAD4,* ***SPAG16****, SQRDL, THRB,* ***TMED7****, TMEM43, TP53,* ***TRIM33, WBP5****, YY2* | 22 | 13 | Tumor Morphology, Lipid Metabolism, Small Molecule Biochemistry |
| **Module 18** | |  |  |  |  |  |  |  |  |  |
| 1 | Actin, ***ADIPOR2***, Akt, Calmodulin, Caspase, ***CLIC4, ELOVL5, ERK****,* F Actin, ***FGFR2, GSN, HNRNPC****,* Insulin, I*QGAP1,* ***JAK2, KCNQ2, LITAF, LRRC1***, Mapk, *MIR124,* ***MYLK, NCAM1****,*NFkB (complex), Pdgf, ***PHLPP1, PLOD3, PRKCZ***, Rac, Rap1, ***RAP1A, RUNDC3A, STUB1, SYPL1, VAMP3, WIPF1*** | 48 | 22 | Cell-To-Cell Signaling and Interaction, Cellular Function and Maintenance, Reproductive System Development and Function |  | 3 | *ABTB1,* ***ARHGAP19****, BRIP1, CRMP, CRMP1, CTR9, DNTTIP1,* ***DPYSL4,*** *DPYSL5,* ***DST****, EGLN1, EID2, ESR1, HSF2BP,* ***LAMP1,*** Lefty, M*CM3AP,* ***MSH6****, NAGK,* ***NIT1,*** *PDE7A,* ***PDE8A,*** *REL,* ***RNF123****, SLC39A8, SMAD2, SMAD9, SVEP1, TBC1D1, TBX21, TGFB1,* ***TRAM1****,* ***UBE2J1****, VASN, ZNHIT6* | 18 | 10 | Organismal Injury and Abnormalities, Reproductive System Disease, Endocrine System Disorders |
| 2 | ***ATP6V0E2,*** *BCL6, CA4,* ***CA11,*** *CCT6A,* ***CDC2L6****, COL9A1, EHMT1, FAM173A, HDAC1,* Histone h3, *HTT, IL6, KIAA0101, KLF11,* ***LGALS3BP****,* ***MEIS1, MTUS1,*** *OSBPL1A, OSGIN1,* Pgk, *POU2F3, RECQL4, RNF20,* ***SALL1, SENP7,*** *SESN1,* ***SH3BP4****, SLC5A8, TBX3, TP53,* ***TUBA3C, TXNIP****, UBE2S, ZMYND8* | 19 | 11 | Cancer, Immunological Disease, Gene Expression |  |  |  |  |  |  |

Functional networks were determined using Ingenuity Systems Analysis. All of the molecules that compose each network are listed; those shown in bold represent focus molecule that appeared in the given modules. The numbers of focus genes (#) is indicated. The significance score shown is the negative exponent of the right-tailed Fisher's exact test result.
